# Supplementary material
Source: PubMed Central journal article supplement (PMC3177276)
Supplement: supp_pp.111.176545_176545Supplemental_Figure_S1.pdf [file supp_pp.111.176545_176545Supplemental_Figure_S1.pdf]

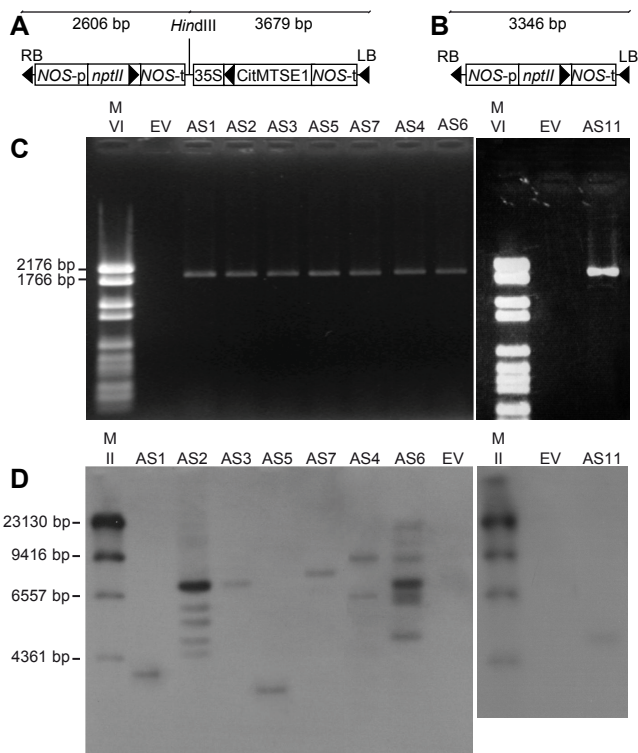

**Supplemental Figure S1.** Molecular analyses of Navelina (AS1-AS7) and Pineapple (AS11) citrus plants transformed with the limonene synthase gene in an antisense orientation. (A, B) Map of the T-DNA region of the binary vector used to transform AS (A) and EV plants (B). LB, left T-DNA border region; RB, right T-DNA border region; *nptII*, gene conferring kanamycin resistance under the control of the *NOS* promoter and terminator regions; *CitMTSE1*, limonene synthase gene in antisense orientation under control of the CaMV35S promoter and *NOS* terminator. (C) PCR analysis. (D) Southern blot analysis indicating the loci number of the transgene. The 35S promoter was used as probe. M: DNA molecular weight markers II and VI from Roche Applied Science.
