# Supplementary material
Source: PubMed Central journal article supplement (PMC3177276)
Supplement: supp_pp.111.176545_176545Supplemental_figure_S2.pdf [file supp_pp.111.176545_176545Supplemental_figure_S2.pdf]

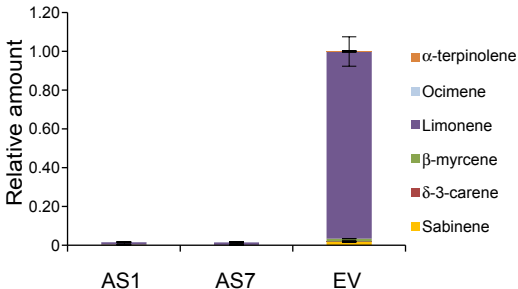

**Supplemental Figure S2.** Relative amounts of individual terpenes in fruits used for the assays, presented as a percentage area (fraction of unity) of each terpene with respect to the total terpene peak area for monoterpene hydrocarbons in the EV line, which was assigned an arbitrary value of one in *Penicillium digitatum* assays. Data represent mean values  $\pm$  s.e.m. and are derived from at least five fruits per plant.
