# Supplementary material
Source: PubMed Central journal article supplement (PMC3177276)
Supplement: supp_pp.111.176545_176545Supplemental_figure_S4.pdf [file supp_pp.111.176545_176545Supplemental_figure_S4.pdf]

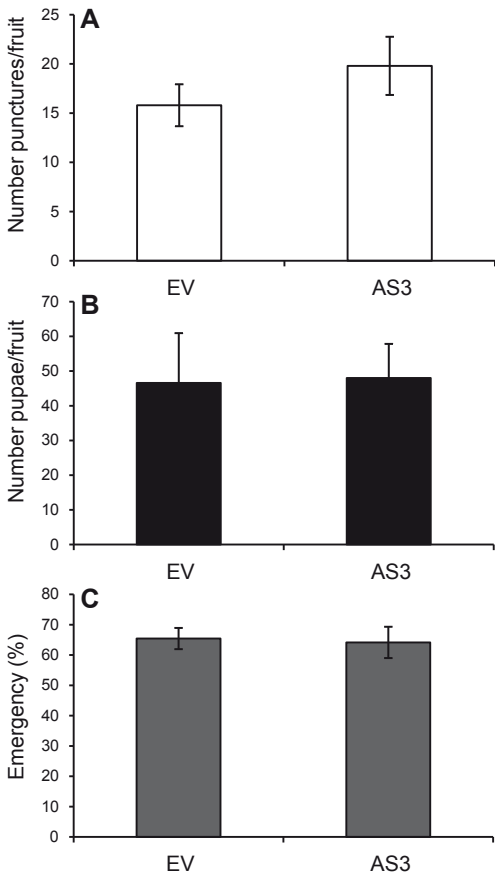

**Supplemental Figure S4.** Oviposition response of *Ceratitis capitata* females in no-choice assays after three days of exposure to the orange odor of AS and EV plants. (A) Number of punctures per fruit. (B) Number of pupae per fruit. (C) Percentage of emergence. Results are average  $\pm$  s.e.m. ( $n = 5$ ). No significant differences were found at  $P < 0.05$ , using a Mann-Whitney  $U$  test. We repeated all experiments at least twice and obtained similar results.
