# Supplementary material
Source: PubMed Central journal article supplement (PMC3177276)
Supplement: supp_pp.111.176545_176545Supplemental_Figure_S5.pdf [file supp_pp.111.176545_176545Supplemental_Figure_S5.pdf]

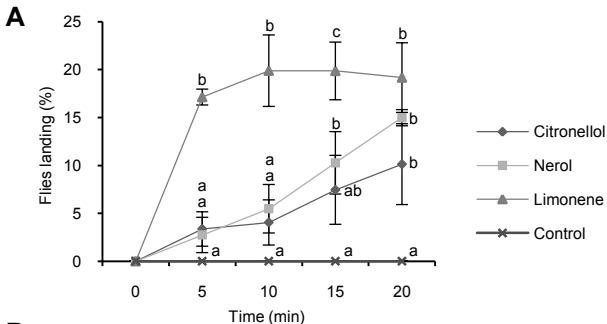

**B**

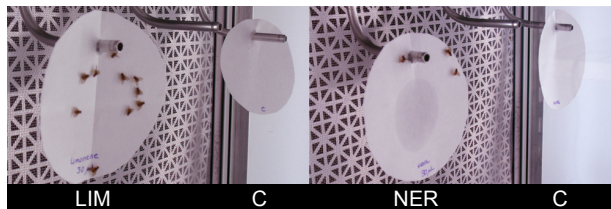

**Supplemental Figure S5.** Terpene-mediated response of *Ceratitis capitata* males exposed to pure synthetic monoterpene compounds in flight tunnel assays. (A) Mean percentage of flies landing on paper disks supplemented with 30  $\mu$ L of water or pure synthetic compounds. Results are average  $\pm$  s.e.m. ( $n = 10$ ). Treatments with different letters are significantly different at  $P < 0.05$  using Fisher's Protected LSD test. (B) Terpene-mediated landing of flies on limonene (LIM), nerol (NER) or water control (C) disks.
