# Supplementary material
Source: PubMed Central journal article supplement (PMC3177276)
Supplement: supp_pp.111.176545_176545Supplemental_Figure_S6.pdf [file supp_pp.111.176545_176545Supplemental_Figure_S6.pdf]

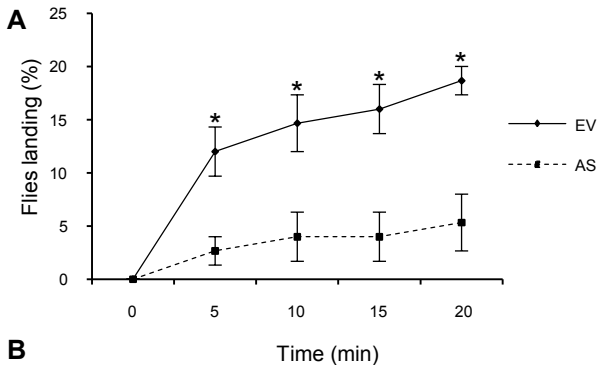

**B**

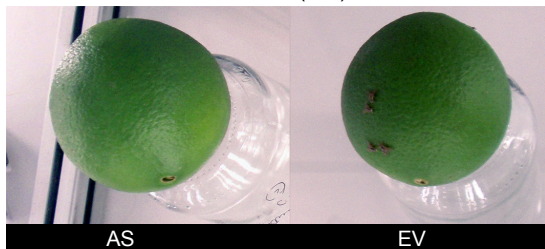

**Supplemental Figure S6.** Terpene-mediated response of *Ceratitis capitata* males exposed to AS and EV green fruits in flight tunnel assays. (A) Mean percentage of flies landing on AS and EV control fruits. Results are average  $\pm$  s.e.m. ( $n = 5$ ). \*,  $P < 0.05$  using a Mann-Whitney  $U$  test. (B) Terpene-mediated landing of flies on AS (left) and EV (right) fruits.
