# Supplementary material
Source: PubMed Central journal article supplement (PMC3177276)
Supplement: supp_pp.111.176545_176545Supplemental_Table_S1.pdf [file supp_pp.111.176545_176545Supplemental_Table_S1.pdf]

**Supplemental Table S1.** Fold-change of volatiles in AS transgenics compared to EV control Navelina sweet orange mature flavedo. The level of accumulation of individual volatiles in EV flavedo was arbitrarily set to 1.0. Negative values indicate decreases and positive values reflect increases of the specific volatile with respect to the reference EV line. Data represent mean values  $\pm$  s.e.m. and are derived from at least five fruits per plant.

| Compounds             | Line    |        |          |        |        |        |         |        |      |
|-----------------------|---------|--------|----------|--------|--------|--------|---------|--------|------|
|                       | AS1     |        | AS3      |        | AS6    |        | AS7     |        | EV   |
|                       | MEAN    | S.E.M. | MEAN     | S.E.M. | MEAN   | S.E.M. | MEAN    | S.E.M. |      |
| <b>Monoterpenes</b>   |         |        |          |        |        |        |         |        |      |
| <b>Hydrocarbons</b>   |         |        |          |        |        |        |         |        |      |
| Sabinene              | - 8.72  | 0.01   | - 5.71   | 0.00   | - 2.07 | 0.01   | -6.82   | 0.02   |      |
| $\delta$ -3-carene    | nd      |        | nd       |        | - 1.08 | 0.08   | nd      |        |      |
| $\beta$ -myrcene      | - 51.02 | 0.00   | - 57.38  | 0.00   | - 1.38 | 0.01   | - 82.69 | 0.01   |      |
| D-Limonene            | - 90.88 | 0.00   | - 107.39 | 0.00   | - 1.33 | 0.07   | - 85.95 | 0.00   |      |
| Ocimene               | - 3.28  | 0.07   | - 1.84   | 0.32   | 1.63   | 0.42   | - 3.07  | 0.10   |      |
| $\alpha$ -terpinolene | nd      |        | nd       |        | - 1.06 | 0.33   | nd      |        |      |
| Relative (%)          | 43.5    |        | 45.3     |        | 95.8   |        | 49.7    |        | 96.0 |
| <b>Aldehydes</b>      |         |        |          |        |        |        |         |        |      |
| Z-citral              | - 3.02  | 0.05   | - 5.65   | 0.07   | - 1.28 | 0.16   | - 5.33  | 0.05   |      |
| E-citral*             | nd      |        | nd       |        | - 1.19 | 0.17   | nd      |        |      |
| Citronellal           | -1.31   | 0.21   | - 1.16   | 0.26   | -1.15  | 0.12   | -1.48   | 0.21   |      |
| Perilla aldehyde      | nd      |        | nd       |        | - 1.23 | 0.10   | nd      |        |      |
| Relative (%)          | 3.6     |        | 3.0      |        | 0.5    |        | 2.7     |        | 0.5  |
| <b>Alcohols</b>       |         |        |          |        |        |        |         |        |      |
| E-sabinene hydrate    | - 10.07 | 0.00   | - 6.20   | 0.04   | - 1.61 | 0.07   | - 7.71  | 0.03   |      |
| Z-sabinene hydrate    | - 26.65 | 0.04   | - 11.64  | 0.09   | - 1.40 | 0.13   | - 3.98  | 0.02   |      |
| Linalool              | 1.07    | 0.27   | 1.05     | 0.02   | 1.40   | 0.36   | - 2.02  | 0.03   |      |
| 1-octanol             | - 1.91  | 0.29   | -1.20    | 0.35   | 1.22   | 0.37   | 1.10    | 0.32   |      |
| 4-terpineol           | - 4.66  | 0.04   | - 1.87   | 0.03   | - 1.42 | 0.02   | - 3.92  | 0.00   |      |
| E-p-mentha-2,8-dienol | nd      |        | nd       |        | 1.64   | 0.03   | - 12.22 | 0.08   |      |
| $\alpha$ -terpineol   | - 21.23 | 0.01   | - 11.78  | 0.03   | -1.41  | 0.02   | -15.77  | 0.02   |      |
| $\beta$ -citronellol  | 18.65   | 3.88   | 10.45    | 1.26   | 3      | 0.45   | 11.43   | 0.28   |      |
| Nerol                 | 14.71   | 2.09   | 9.98     | 2.64   | 4.45   | 2.84   | 16.57   | 4.70   |      |
| E-carveol             | nd      |        | nd       |        | - 1.06 | 0.31   | nd      | 0.00   |      |
| Geraniol              | 3.95    | 0.24   | 4.61     | 0.90   | 1.61   | 0.82   | 4.45    | 2.88   |      |
| Z-carveol             | nd      |        | nd       |        | 1.68   | 0.51   | nd      |        |      |
| Relative (%)          | 34.5    |        | 31.7     |        | 1.6    |        | 21.7    |        | 0.9  |
| <b>Esters</b>         |         |        |          |        |        |        |         |        |      |
| Neryl acetate*        | p       |        | p        |        | nd     |        | p       |        |      |
| Geranyl acetate       | 3.25    | 1.47   | 3.85     | 0.87   | 1.49   | 0.60   | 3.65    | 0.92   |      |
| Perilla acetate       | nd      |        | nd       |        | nd     |        | nd      |        |      |
| Limonen-10-yl acetate | nd      |        | nd       |        | nd     |        | nd      |        |      |
| Relative (%)          | 7.9     |        | 7.2      |        | 0.01   |        | 8.3     |        | 0.01 |
| <b>Sesquiterpenes</b> |         |        |          |        |        |        |         |        |      |
| <b>Hydrocarbons</b>   |         |        |          |        |        |        |         |        |      |

|                                              |         |      |         |      |        |      |         |      |      |
|----------------------------------------------|---------|------|---------|------|--------|------|---------|------|------|
| <b><math>\alpha</math>-copaene</b>           | nd      |      | nd      |      | - 4.57 | 0.22 | nd      |      |      |
| <b><math>\beta</math>-cubebene</b>           | nd      |      | nd      |      | - 2.36 | 0.11 | - 44.50 | 0.02 |      |
| <b>Germacrene D</b>                          | nd      |      | nd      |      | - 1.81 | 0.32 | nd      |      |      |
| <b><math>\beta</math>-elemene</b>            | - 3.51  | 0.00 | - 1.81  | 0.30 | 1.11   | 0.04 | - 1.30  | 0.19 |      |
| <b><math>\alpha</math>-caryophyllene</b>     | - 7.46  | 0.02 | - 11.58 | 0.03 | - 3.09 | 0.03 | - 5.33  | 0.04 |      |
| <b><math>\beta</math>-farnesene</b>          | nd      |      | - 6.96  | 0.14 | - 1.86 | 0.54 | nd      |      |      |
| <b>Valencene</b>                             | - 1.89  | 0.16 | - 1.39  | 0.35 | 1.08   | 0.24 | - 1.34  | 0.01 |      |
| <b><math>\delta</math>-Cadinene</b>          | - 6.08  | 0.00 | - 5.45  | 0.01 | - 1.29 | 0.00 | - 5.71  | 0.00 |      |
| <b><math>\alpha</math>-muurolene</b>         | nd      |      | nd      |      | nd     |      | nd      |      |      |
| <b><math>\beta</math>-sesquiphellandrene</b> | - 3.47  | 0.07 | - 1.95  | 0.24 | 1.28   | 1.01 | 1.02    | 0.04 |      |
| <b>Relative (%)</b>                          |         | 4    |         | 5.4  |        | 0.4  |         | 6.7  | 0.4  |
| <b>Aldehydes</b>                             |         |      |         |      |        |      |         |      |      |
| <b><math>\beta</math>-sinensal</b>           | - 6.27  | 0.09 | - 12.30 | 0.02 | - 2.64 | 0.07 | - 6.75  | 0.05 |      |
| <b><math>\alpha</math>-sinensal</b>          | - 4.93  | 0.03 | - 3.41  | 0.08 | 1.23   | 0.07 | - 4.46  | 0.02 |      |
| <b>Relative (%)</b>                          |         | 0.6  |         | 0.8  |        | 0.1  |         | 0.7  | 0.1  |
| <b>Alcohols</b>                              |         |      |         |      |        |      |         |      |      |
| <b>d-nerolidol</b>                           | nd      |      | nd      |      | - 4.32 | 0.23 | nd      |      |      |
| <b>Elemol</b>                                | - 44.76 | 0.02 | nd      |      | - 2.23 | 0.21 | nd      |      |      |
| <b>Relative (%)</b>                          |         | 0.5  |         | 0    |        | 0.01 |         | 0    | 0.02 |
| <b>Aliphatic aldehydes</b>                   |         |      |         |      |        |      |         |      |      |
| <b>Octanal</b>                               | - 35.58 | 0.00 | - 38.16 | 0.00 | - 1.90 | 0.03 | - 20.34 | 0.01 |      |
| <b>Nonanal</b>                               | - 15.12 | 0.00 | - 22.68 | 0.00 | - 1.90 | 0.00 | - 9.94  | 0.00 |      |
| <b>Decanal</b>                               | - 10.57 | 0.02 | - 11.58 | 0.01 | - 1.44 | 0.07 | - 6.39  | 0.06 |      |
| <b>Undecanal</b>                             | - 5.95  | 0.05 | - 9.62  | 0.10 | - 1.75 | 0.06 | - 5.28  | 0.05 |      |
| <b>2-decanal</b>                             | nd      |      | nd      |      | - 1.15 | 0.53 | nd      |      |      |
| <b>Relative (%)</b>                          |         | 3.3  |         | 3    |        | 1.3  |         | 5.5  | 1.8  |
| <b>Others/Irregular</b>                      |         |      |         |      |        |      |         |      |      |
| <b>(+)-Isopiperitenone</b>                   | nd      |      | nd      |      | - 1.58 | 0.63 | nd      |      |      |
| <b>Z-limonene oxide</b>                      | nd      |      | nd      |      | 1.29   | 0.29 | nd      |      |      |
| <b>E-limonene oxide</b>                      | - 6.07  | 0.07 | nd      |      | - 1.07 | 0.26 | - 7.47  | 0.13 |      |
| <b>Caryophyllene oxide</b>                   | 1.11    | 0.12 | - 1.07  | 0.29 | 1.94   | 0.28 | 2.36    | 0.63 |      |
| <b><math>\beta</math>-cyclocitral</b>        | 1.37    | 0.65 | - 1.23  | 0.26 | 1.02   | 0.51 | 1.17    | 0.83 |      |
| <b>Relative (%)</b>                          |         | 1.0  |         | 1.2  |        | 0.2  |         | 1.9  | 0.2  |

nd: non-detectable

p: present (impossible to quantify fold-change because it is not present in EV plants)

\* Compound differing from EV (E-citral) and AS plants (Neryl acetate)
