# Supplementary material
Source: PubMed Central journal article supplement (PMC3177276)
Supplement: supp_pp.111.176545_176545Supplemental_Table_S2.pdf [file supp_pp.111.176545_176545Supplemental_Table_S2.pdf]

**Supplemental Table S2.** Fold-change of volatiles in AS transgenics compared to EV control Pineapple sweet orange mature flavedo. The level of accumulation of individual volatiles in EV flavedo was arbitrarily set to 1.0. Negative values indicate decreases and positive values reflect increases in the specific volatile with respect to the reference EV line. Data represent the mean values  $\pm$  s.e.m. and are derived from at least five fruits per plant.

| Compounds                     | Transgenic line |              |
|-------------------------------|-----------------|--------------|
|                               | AS11<br>MEAN    | EV<br>S.E.M. |
| <b>Monoterpenes</b>           |                 |              |
| <b>Hydrocarbons</b>           |                 |              |
| Sabinene                      | - 16.13         | 0.00         |
| $\beta$ -myrcene              | - 33.46         | 0.00         |
| D-Limonene                    | - 32.48         | 0.00         |
| Ocimene                       | - 1.83          | 0.03         |
| $\alpha$ -terpinolene         | nd              |              |
| Relative (%)                  | 51.6            | 97.2         |
| <b>Aldehydes</b>              |                 |              |
| Z-citral                      | - 1.84          |              |
| E-citral*                     | nd              |              |
| Citronellal                   | - 1.03          | 0.04         |
| Perilla aldehyde              | nd              |              |
| Relative (%)                  | 1.4             | 0.1          |
| <b>Alcohols</b>               |                 |              |
| E-sabinene hydrate            | - 6.76          | 0.03         |
| Z-sabinene hydrate            | nd              |              |
| Linalool                      | 2.23            | 0.02         |
| 1-octanol                     | nd              |              |
| 4-terpineol                   | nd              |              |
| $\alpha$ -terpineol           | - 15.74         | 0.00         |
| $\beta$ -citronellol          | 13.73           | 0.57         |
| Nerol                         | 5.49            | 0.31         |
| E-carveol                     | nd              |              |
| Geraniol                      | 2.47            | 0.15         |
| E-p-mentha-2,8-dienol         | nd              |              |
| p-mentha-1(7),8(10)-dien-9-ol | nd              |              |
| Relative (%)                  | 37.6            | 1.0          |
| <b>Esters</b>                 |                 |              |
| Citronellyl acetate           | p               |              |
| Neryl acetate*                | p               |              |
| Geranyl acetate               | p               |              |
| Limonen-10-yl acetate         | nd              |              |
| Relative (%)                  | 6.3             | 0.01         |
| <b>Sesquiterpenes</b>         |                 |              |
| <b>Hydrocarbons</b>           |                 |              |

|                                                         |         |      |      |
|---------------------------------------------------------|---------|------|------|
| <b><math>\alpha</math>-copaene</b>                      | - 5.24  | 0.02 |      |
| <b><math>\beta</math>-cubebene</b>                      | nd      |      |      |
| <b>Germacrene D</b>                                     | nd      |      |      |
| <b><math>\alpha</math>-gurjunene</b>                    | nd      |      |      |
| <b><math>\beta</math>-elemene</b>                       | nd      |      |      |
| <b><math>\beta</math>-selinene</b>                      | nd      |      |      |
| <b><math>\alpha</math>-caryophyllene</b>                | nd      |      |      |
| <b><math>\beta</math>-caryophyllene</b>                 | - 1.82  | 0.01 |      |
| <b>Z-<math>\beta</math>-farnesene</b>                   | nd      |      |      |
| <b>Valencene</b>                                        | - 30.48 | 0.00 |      |
| <b><math>\alpha</math>-selinene</b>                     | nd      |      |      |
| <b>Germacrene B</b>                                     | nd      |      |      |
| <b><math>\delta</math>-cadinene</b>                     | - 10.34 | 0.00 |      |
| <b>Relative (%)</b>                                     |         | 0.7  | 0.7  |
| <b>Aldehydes</b>                                        |         |      |      |
| <b><math>\beta</math>-sinensal</b>                      | nd      |      |      |
| <b><math>\alpha</math>-sinensal</b>                     | - 2.43  | 0.06 |      |
| <b>Relative (%)</b>                                     |         | 0.2  | 0.2  |
| <b>Alcohols</b>                                         |         |      |      |
| <b>d-nerolidol</b>                                      | nd      |      |      |
| <b>Elemol</b>                                           | - 6.87  | 0.00 |      |
| <b>Relative (%)</b>                                     |         | 0.03 | 0.04 |
| <b>Aliphatic aldehydes</b>                              |         |      |      |
| <b>Octanal</b>                                          | - 3.63  | 0.01 |      |
| <b>Nonanal</b>                                          | nd      |      |      |
| <b>Decanal</b>                                          | - 18.66 | 0.00 |      |
| <b>2-decenal</b>                                        | nd      |      |      |
| <b>Decadienal</b>                                       | nd      |      |      |
| <b>Relative (%)</b>                                     |         | 1.4  | 0.4  |
| <b>Others</b>                                           |         |      |      |
| <b>(+)-isopiperitenone</b>                              | - 4.09  | 0.00 |      |
| <b>E-limonene oxide</b>                                 | - 3.70  | 0.01 |      |
| <b>Caryophyllene oxide</b>                              | nd      |      |      |
| <b><math>\beta</math>-cyclocitral</b>                   | nd      |      |      |
| <b>Cyclohexane, 2-ethenyl-1,1-dimethyl-3-methylene-</b> | nd      |      |      |
| <b>Z-3-hexen-1-ol</b>                                   | -1.55   | 0.00 |      |
| <b>Relative (%)</b>                                     |         | 0.2  | 0.2  |

nd: non-detectable

p: present (impossible to quantify fold-change because it is not present in EV plants)

\* Compound differing from EV (E-citral) and AS plants (Neryl acetate)
